# Supplementary material for: Targeting Human Parainfluenza Virus Type-1 Haemagglutinin-Neuraminidase with Mechanism-Based Inhibitors
Source: PubMed Central journal article supplement (PMC6563277; doi:10.3390/v11050417), 2019-05-05

## Supplementary Information

### Targeting human parainfluenza virus type-1 haemagglutinin-neuraminidase with mechanism-based inhibitors

Tanguy Eveno<sup>1</sup>, Larissa Dirr<sup>1</sup>, Ibrahim M. El-Deeb<sup>1+</sup>, Patrice Guillon<sup>1+</sup> and Mark von Itzstein<sup>1\*\*</sup>

<sup>1</sup> Institute for Glycomics, Griffith University, Gold Coast Campus, Queensland, 4222, Australia.

\* Correspondence and requests for materials should be addressed to [m.vonitzstein@griffith.edu.au](mailto:m.vonitzstein@griffith.edu.au)

+ Ibrahim M. El-Deeb, Patrice Guillon and Mark von Itzstein jointly supervised this work.

### Supplementary figure legends

**Supplementary Figure S1. Time course study of the hydrolysis of MUN by hPIV-1 HN.** The hydrolysis of MUN and the mutarotation of the released  $\alpha$ -Neu5Ac into  $\beta$ -Neu5Ac were monitored by <sup>1</sup>H NMR spectroscopy. The reaction contained 5  $\mu$ g of HN, 5 mM of MUN in a final volume of 200  $\mu$ L of 50 mM NaOAc, 5 mM CaCl<sub>2</sub>, pD 5 and was incubated at 25 °C for 1 hour. eq: equatorial, ax: axial. The other signals at ~2.35 and 1.95 ppm are associated with the CH<sub>3</sub> group of MUN and the acetamido moiety of  $\alpha,\beta$ -Neu5Ac, respectively.

**Supplementary Figure S2. Acidic hydrolysis of MUN over 12 hours.** The acidic hydrolysis of MUN in the reaction buffer (50 mM NaOAc, 5 mM CaCl<sub>2</sub>, pD 5) was monitored by <sup>1</sup>H NMR spectroscopy. The reaction contained 5 mM of MUN in 200  $\mu$ L of reaction buffer. eq: equatorial, ax: axial. The other signals at ~2.35 and 1.95 ppm are associated with the CH<sub>3</sub> group of MUN and the acetamido moiety of  $\alpha,\beta$ -Neu5Ac, respectively.

### Supplementary Figure S1

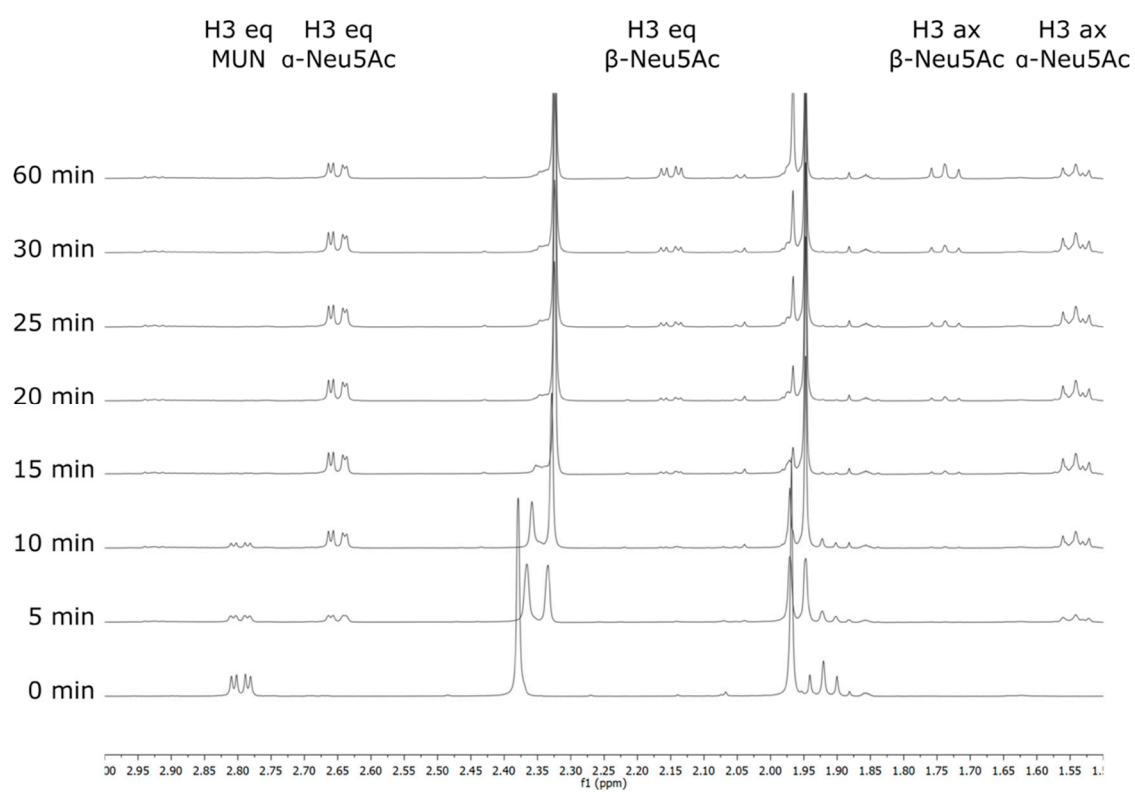

### Supplementary Figure S2

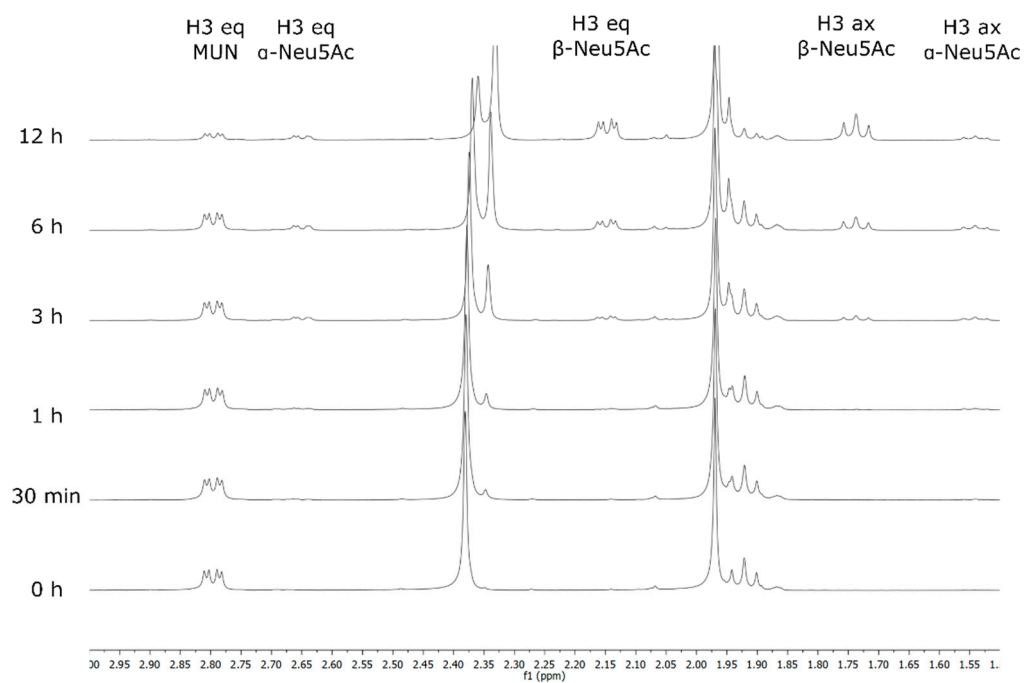

Supplement: viruses-11-00417-s001.pdf [file viruses-11-00417-s001.pdf]
